# Supplementary material for: Efficacy of Different Energy Levels Used in Focused and Radial Extracorporeal Shockwave Therapy in the Treatment of Plantar Fasciitis: A Meta-Analysis of Randomized Placebo-Controlled Trials
Source: J Clin Med. 2019 Sep 19;8(9):1497. doi: 10.3390/jcm8091497 (PMC6780733; doi:10.3390/jcm8091497)
Supplement: Supplementary file 1 [file jcm-08-01497-s001.pdf]

## Supplement material

Table S1. A sensitivity analysis for meta-analysis of visual analog scale (VAS) scores in medium-energy ESWT and placebo-controlled groups.

| Altered dataset                | Follow-up time (month) | Model  | Number of trials | Mean difference | 95% CI       | p-value  | $I^2$ |
|--------------------------------|------------------------|--------|------------------|-----------------|--------------|----------|-------|
| Removal of Speed et al. 2003   | 1                      | Fixed  | 1                | -6.92           | -7.12, -6.72 | <0.00001 | NA    |
| Removal of Ibrahim et al. 2017 | 1                      | Fixed  | 1                | -0.12           | -1.06, 0.82  | 0.80     | NA    |
| Removal of Speed et al. 2003   | 3                      | Fixed  | 1                | -6.64           | -6.78, -6.50 | <0.00001 | NA    |
| Removal of Ibrahim et al. 2017 | 3                      | Fixed  | 1                | -0.57           | -1.81, 0.67  | 0.37     | NA    |
| Removal of Speed et al. 2003   | 6                      | Random | 2                | -4.78           | -8.97, -0.59 | 0.03     | 98%   |
| Removal of Rompe et al. 2003   | 6                      | Random | 2                | -3.18           | -10.49, 4.12 | 0.39     | 99%   |
| Removal of Ibrahim et al. 2017 | 6                      | Random | 2                | -1.03           | -4.14, 2.08  | 0.52     | 92%   |
| Removal of Rompe et al. 2003   | 12                     | Fixed  | 1                | -4.56           | -4.86, -4.26 | <0.00001 | NA    |
| Removal of Ibrahim et al. 2017 | 12                     | Fixed  | 1                | -2.90           | -3.98, -1.82 | <0.00001 | NA    |

NA : not available

(a) 1-month follow-up

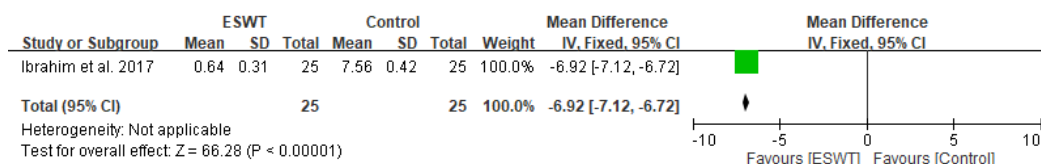

(b) 3-month follow-up

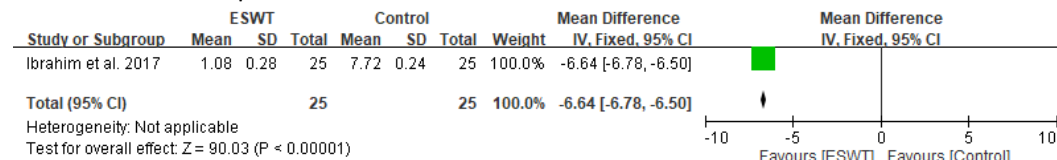

(c) 6-month follow-up

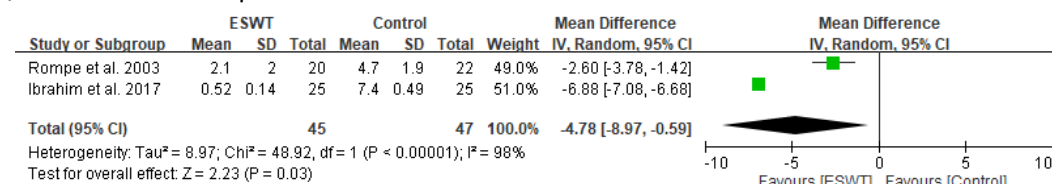

Supplement Fig. 1. Forest plots of visual analog scale (VAS) scores in medium-energy ESWT and placebo-controlled groups at 1-month (a), 3-month (b), and 6-month (c) follow-ups

(a) Radial ESWT at 3-6 months follow-up

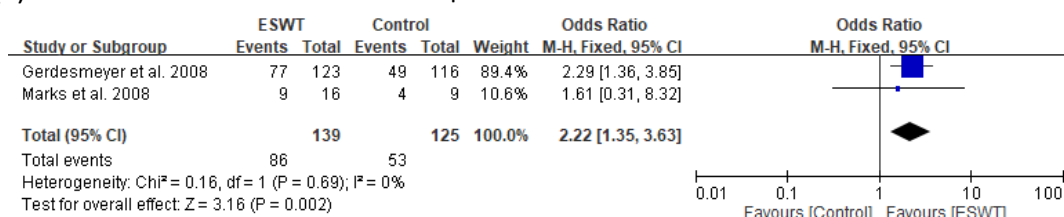

(b) Radial ESWT at 12-month follow-up

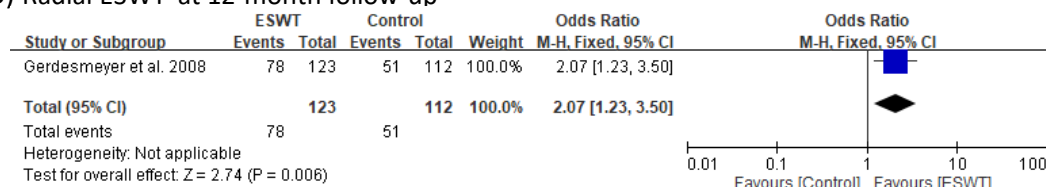

Supplement Fig. 2. Forest plots of treatment success rates in medium-energy radial ESWT placebo-controlled groups at 3-6-month (a) and 12-month (b) follow-ups.

(a) Focused ESWT at 3-6 months follow-up

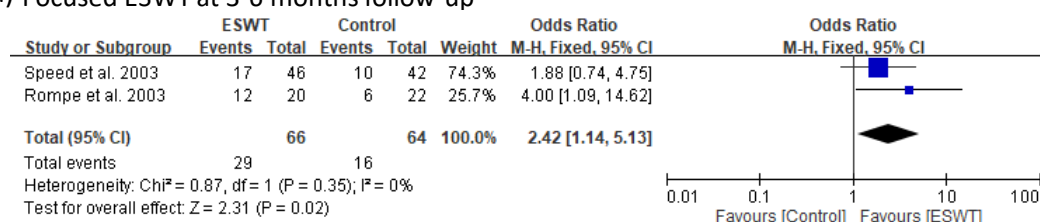

(b) Focused ESWT at 12 months follow-up

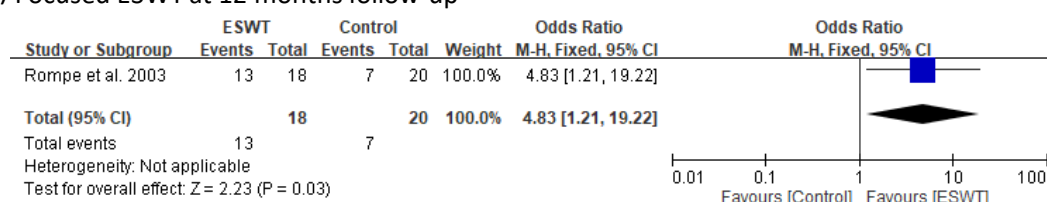

Supplement Fig. 3. Forest plots of treatment success rates in medium-energy focused ESWT and placebo-controlled groups at 3-6-month (a) and 12-month (b) follow-ups.

(a) Radial ESWT at 6 months follow-up

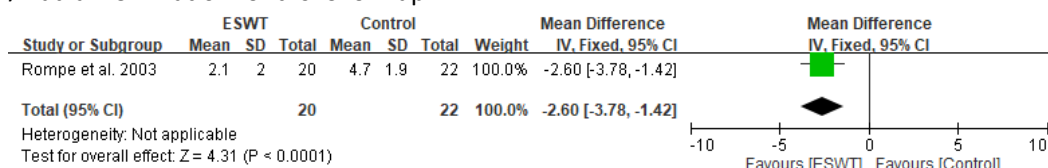

(b) Radial ESWT at 12 months follow-up

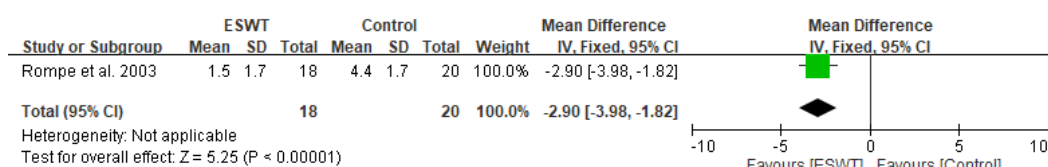

Supplement Fig. 4. Forest plots of visual analog scale (VAS) scores in medium-energy radial ESWT and placebo-controlled groups at 6-month (a) and 12-month (b) follow-ups.

(a) Focused ESWT at 6 months follow-up

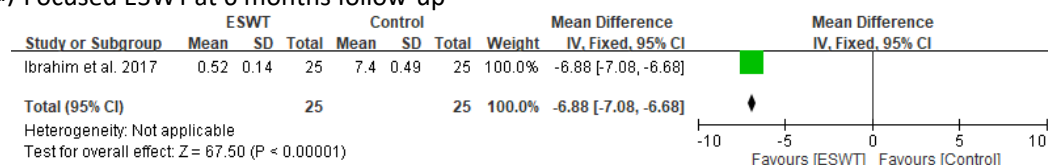

(b) Focused ESWT at 12 months follow-up

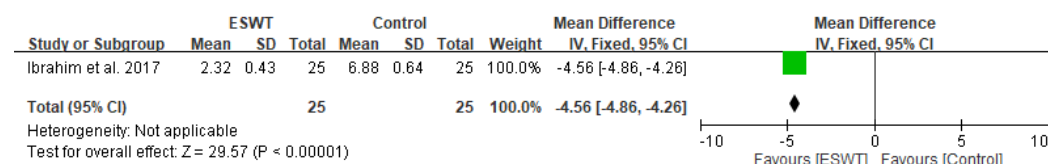

Supplement Fig. 5. Forest plots of visual analog scale (VAS) scores in medium-energy focused ESWT and placebo-controlled groups at 6-month (a) and 12-month (b) follow-ups.

(a) without use of local anesthesia

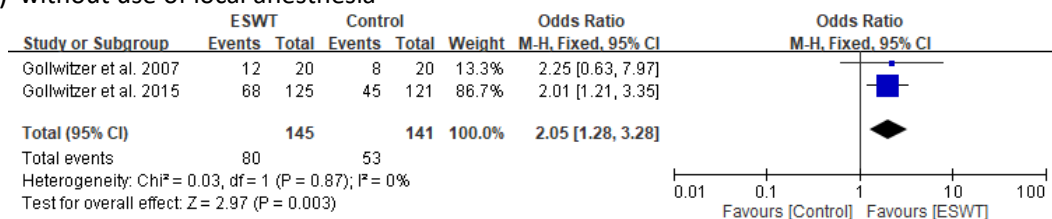

(b) with use of local anesthesia

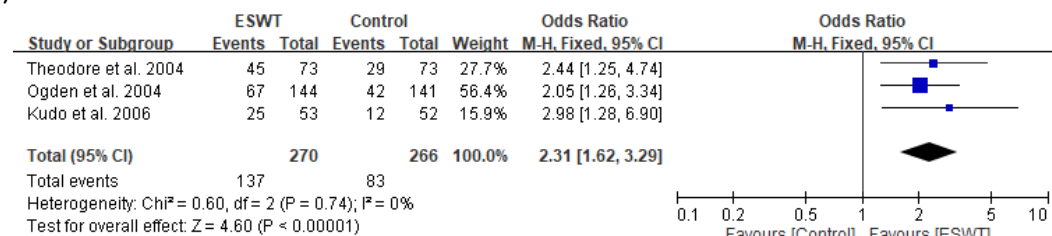

Supplement Fig. 6. Forest plots of treatment success rates in high-energy ESWT without (a) and with (b) use of local anesthesia and placebo-controlled groups at 3-month follow-up.

(a) without use of local anesthesia at 1-month follow-up

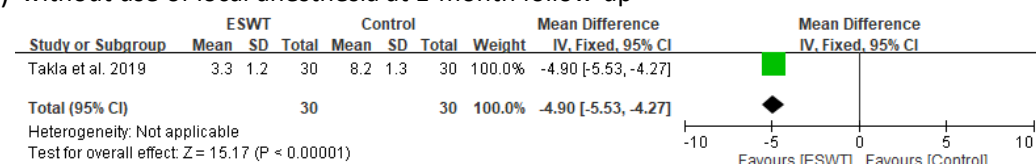

(b) without use of local anesthesia at 3-month follow-up

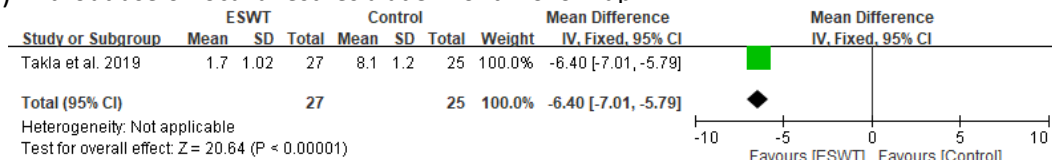

(c) with use of local anesthesia at 1-month follow-up

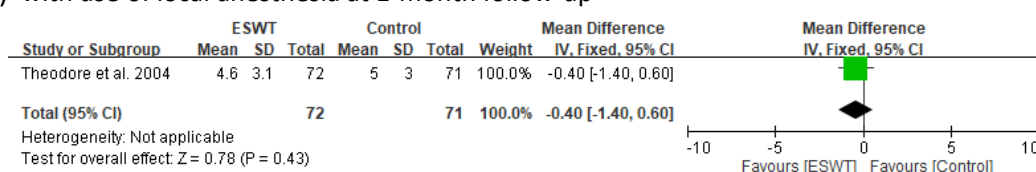

(d) with use of local anesthesia at 3-month follow-up

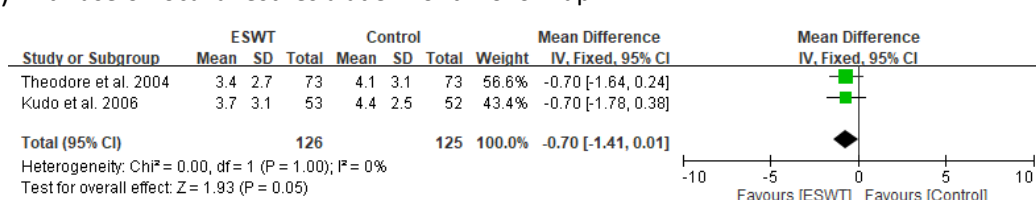

Supplement Fig. 7. Forest plots of visual analog scale (VAS) scores in high-energy ESWT without use of local anesthesia at 1-month (a) and 3-month (b) follow-ups and with use of local anesthesia at 1-month (c) and 3-month (d) follow-ups.
